# Supplementary material for: Discovery of highly anisotropic dielectric crystals with equivariant graph neural networks
Source: Royal Society of Chemistry journal article supplement (doi:10.1039/d4fd00096j), 2024-07-25
Supplement: d4fd00096j1.pdf [file d4fd00096j1.pdf]

# Discovery of highly anisotropic dielectric crystals with equivariant graph neural networks

Yuchen Lou and Alex M. Ganose\*

*Department of Chemistry, Molecular Sciences Research Hub, White City Campus, Imperial  
College London, Wood Lane, London W12 0BZ, UK*

E-mail: a.ganose@imperial.ac.uk

## S1 AnisoNet performance on train and test splits

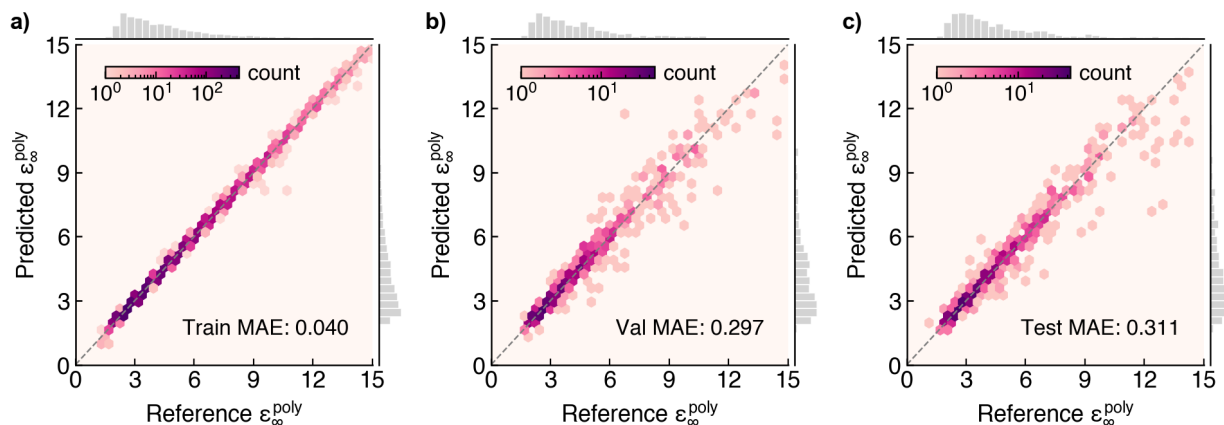

Figure S1: Performance of AnisoNet at predicting the polycrystalline dielectric constant,  $\epsilon_{\infty}^{\text{poly}}$  on the Materials Project dielectric a) train, b) validation, and c) test sets. The data is presented as heatmaps of reference vs predicted dielectric constants where a darker colour indicates more materials.

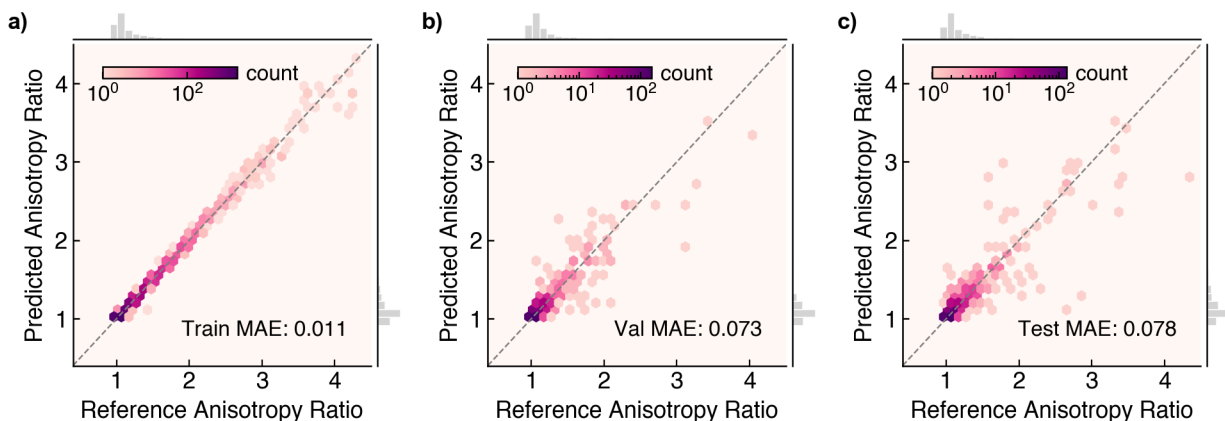

Figure S2: Performance of AnisoNet at predicting the anisotropy ratio on the Materials Project dielectric a) train, b) validation, and c) test sets. The data is presented as heatmaps of reference vs predicted dielectric constants where a darker colour indicates more materials.

## S2 Analysis of predicted Materials Project dataset

While almost all materials have a predicted  $\epsilon_{\infty}^{\text{poly}}$  below 15 (the cut-off for the training set), several outliers exhibited values up to 30. The validity of these predictions should be speculated since there is no material with a higher than 15 for the model to learn from during training. The predicted anisotropy for the Materials Project dataset peaks at 1, with most predictions lying between 1 to 3 and outliers with an  $a_r$  up to 9.

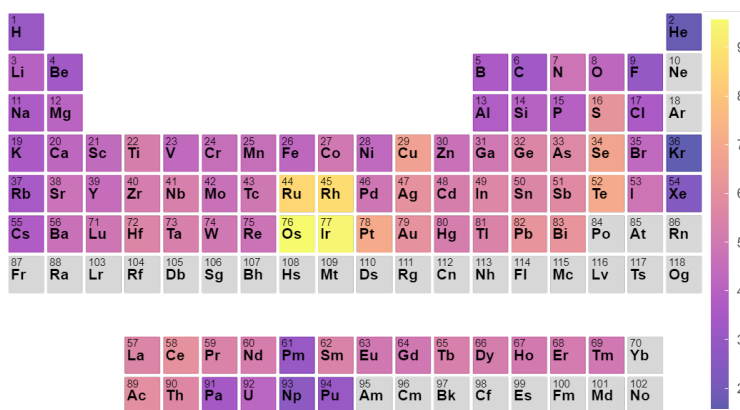

Figure S3: Average predicted polycrystalline dielectric constant ( $\epsilon_{\infty}^{\text{poly}}$ ) of the Materials Project filtered dataset (MP-filtered) across the periodic table. Each element's colour corresponds to the average  $\epsilon_{\infty}^{\text{poly}}$  for all compounds containing that element, and a brighter colour indicates a higher  $\epsilon_{\infty}^{\text{poly}}$ .

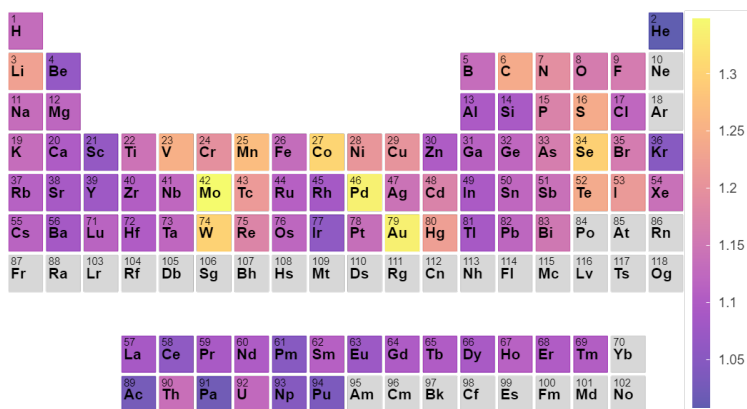

Figure S4: Average anisotropy ratio ( $a_r$ ) for the MP-filtered dataset across the periodic table. Brighter colour indicates higher  $a_r$ .

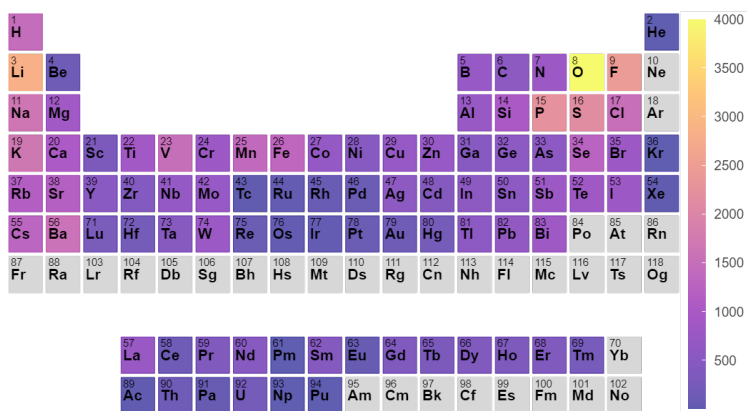

Figure S5: Number of compounds containing a certain element in the MP-filtered dataset. Note that there are 11,990 materials containing oxygen, but the colourbar is capped at 4,000 to increase the contrast between other elements.

### S3 Anisotropic materials discovery

Table S1: List of materials with the highest predicted anisotropy ratio,  $a_r$ , and their DFPT-calculated dielectric tensors. *Ab initio* calculations were performed using the Vienna *ab initio* Simulation Package (VASP)<sup>1,2</sup> and executed using the JOBFLOW<sup>3</sup> and JOBFLOW-REMOTE libraries.

| Material ID | Formula                            | Dielectric Tensor                                                                         | Anisotropy Ratio |
|-------------|------------------------------------|-------------------------------------------------------------------------------------------|------------------|
| mp-1104369  | NaV <sub>2</sub> O <sub>4</sub>    | $\begin{bmatrix} 2.7 & 0.0 & -0.3 \\ 0.0 & 18.4 & 0.0 \\ -0.3 & 0.0 & 20.8 \end{bmatrix}$ | 7.74             |
| mp-1313454  | LiMnCo <sub>3</sub> O <sub>8</sub> | $\begin{bmatrix} 15.0 & -1.3 & 0.0 \\ -1.3 & 10.2 & 0.0 \\ 0.0 & 0.0 & 3.1 \end{bmatrix}$ | 5.94             |
| mp-1023938  | Te <sub>2</sub> Mo                 | $\begin{bmatrix} 11.5 & 0.0 & 0.0 \\ 0.0 & 11.5 & 0.0 \\ 0.0 & 0.0 & 2.0 \end{bmatrix}$   | 5.63             |
| mp-1025649  | Te <sub>6</sub> Mo <sub>2</sub> W  | $\begin{bmatrix} 12.9 & 0.0 & 0.0 \\ 0.0 & 12.9 & 0.0 \\ 0.0 & 0.0 & 2.4 \end{bmatrix}$   | 5.28             |
| mp-1025629  | Te <sub>6</sub> Mo <sub>2</sub> W  | $\begin{bmatrix} 13.1 & 0.0 & 0.0 \\ 0.0 & 13.1 & 0.0 \\ 0.0 & 0.0 & 2.5 \end{bmatrix}$   | 5.24             |
| mp-1026351  | Te <sub>6</sub> MoW <sub>2</sub>   | $\begin{bmatrix} 12.6 & 0.0 & 0.0 \\ 0.0 & 12.6 & 0.0 \\ 0.0 & 0.0 & 2.4 \end{bmatrix}$   | 5.18             |

|            |                                  |                                                                                         |      |
|------------|----------------------------------|-----------------------------------------------------------------------------------------|------|
| mp-1025678 | $\text{Te}_6\text{MoW}_2$        | $\begin{bmatrix} 12.6 & 0.0 & 0.0 \\ 0.0 & 12.6 & 0.0 \\ 0.0 & 0.0 & 2.4 \end{bmatrix}$ | 5.18 |
| mp-1025573 | $\text{Te}_2\text{W}$            | $\begin{bmatrix} 12.5 & 0.0 & 0.0 \\ 0.0 & 12.5 & 0.0 \\ 0.0 & 0.0 & 2.5 \end{bmatrix}$ | 5.06 |
| mp-1030155 | $\text{Te}_8\text{Mo}_3\text{W}$ | $\begin{bmatrix} 14.0 & 0.0 & 0.0 \\ 0.0 & 14.0 & 0.0 \\ 0.0 & 0.0 & 2.8 \end{bmatrix}$ | 5.03 |
| mp-1030331 | $\text{Te}_8\text{Mo}_3\text{W}$ | $\begin{bmatrix} 13.9 & 0.0 & 0.0 \\ 0.0 & 13.9 & 0.0 \\ 0.0 & 0.0 & 2.8 \end{bmatrix}$ | 5.02 |
| mp-1023940 | $\text{MoSe}_2$                  | $\begin{bmatrix} 9.8 & 0.0 & 0.0 \\ 0.0 & 9.8 & 0.0 \\ 0.0 & 0.0 & 2.0 \end{bmatrix}$   | 5.01 |
| mp-1030106 | $\text{Te}_4\text{MoW}$          | $\begin{bmatrix} 13.7 & 0.0 & 0.0 \\ 0.0 & 13.7 & 0.0 \\ 0.0 & 0.0 & 2.8 \end{bmatrix}$ | 4.96 |
| mp-1029256 | $\text{Te}_4\text{MoW}$          | $\begin{bmatrix} 13.7 & 0.0 & 0.0 \\ 0.0 & 13.7 & 0.0 \\ 0.0 & 0.0 & 2.8 \end{bmatrix}$ | 4.96 |
| mp-1030335 | $\text{Te}_4\text{MoW}$          | $\begin{bmatrix} 13.7 & 0.0 & 0.0 \\ 0.0 & 13.7 & 0.0 \\ 0.0 & 0.0 & 2.8 \end{bmatrix}$ | 4.95 |

|            |                                      |                                                                                         |      |
|------------|--------------------------------------|-----------------------------------------------------------------------------------------|------|
| mp-1028594 | $\text{Te}_4\text{MoW}$              | $\begin{bmatrix} 13.7 & 0.0 & 0.0 \\ 0.0 & 13.7 & 0.0 \\ 0.0 & 0.0 & 2.8 \end{bmatrix}$ | 4.95 |
| mp-1023953 | $\text{MoSeS}$                       | $\begin{bmatrix} 9.6 & 0.0 & 0.0 \\ 0.0 & 9.6 & 0.0 \\ 0.0 & 0.0 & 1.9 \end{bmatrix}$   | 4.93 |
| mp-1028576 | $\text{Te}_8\text{MoW}_3$            | $\begin{bmatrix} 13.5 & 0.0 & 0.0 \\ 0.0 & 13.5 & 0.0 \\ 0.0 & 0.0 & 2.8 \end{bmatrix}$ | 4.88 |
| mp-1018806 | $\text{MoSeS}$                       | $\begin{bmatrix} 10.7 & 0.0 & 0.0 \\ 0.0 & 10.7 & 0.0 \\ 0.0 & 0.0 & 2.2 \end{bmatrix}$ | 4.84 |
| mp-1030108 | $\text{Te}_8\text{MoW}_3$            | $\begin{bmatrix} 13.7 & 0.0 & 0.0 \\ 0.0 & 13.7 & 0.0 \\ 0.0 & 0.0 & 2.8 \end{bmatrix}$ | 4.84 |
| mp-1025799 | $\text{MoSe}_2$                      | $\begin{bmatrix} 11.3 & 0.0 & 0.0 \\ 0.0 & 11.3 & 0.0 \\ 0.0 & 0.0 & 2.4 \end{bmatrix}$ | 4.82 |
| mp-1025906 | $\text{Mo}_3(\text{Se}_2\text{S})_2$ | $\begin{bmatrix} 11.0 & 0.0 & 0.0 \\ 0.0 & 11.0 & 0.0 \\ 0.0 & 0.0 & 2.3 \end{bmatrix}$ | 4.81 |
| mp-1023928 | $\text{MoWSe}_4$                     | $\begin{bmatrix} 9.5 & 0.0 & 0.0 \\ 0.0 & 9.5 & 0.0 \\ 0.0 & 0.0 & 2.0 \end{bmatrix}$   | 4.81 |

|            |                                       |                                                                                         |      |
|------------|---------------------------------------|-----------------------------------------------------------------------------------------|------|
| mp-1025819 | $\text{Mo}_3(\text{Se}_2\text{S})_2$  | $\begin{bmatrix} 11.1 & 0.0 & 0.0 \\ 0.0 & 11.1 & 0.0 \\ 0.0 & 0.0 & 2.3 \end{bmatrix}$ | 4.78 |
| mp-1025925 | $\text{Mo}_3(\text{SeS}_2)_2$         | $\begin{bmatrix} 10.5 & 0.0 & 0.0 \\ 0.0 & 10.5 & 0.0 \\ 0.0 & 0.0 & 2.2 \end{bmatrix}$ | 4.76 |
| mp-1023939 | $\text{MoS}_2$                        | $\begin{bmatrix} 9.0 & 0.0 & 0.0 \\ 0.0 & 9.0 & 0.0 \\ 0.0 & 0.0 & 1.9 \end{bmatrix}$   | 4.75 |
| mp-1025988 | $\text{Mo}_3(\text{SeS}_2)_2$         | $\begin{bmatrix} 10.8 & 0.0 & 0.0 \\ 0.0 & 10.8 & 0.0 \\ 0.0 & 0.0 & 2.3 \end{bmatrix}$ | 4.73 |
| mp-1026023 | $\text{Mo}_2\text{W}(\text{SeS}_2)_2$ | $\begin{bmatrix} 10.0 & 0.0 & 0.0 \\ 0.0 & 10.0 & 0.0 \\ 0.0 & 0.0 & 2.1 \end{bmatrix}$ | 4.68 |
| mp-1025941 | $\text{Mo}_2\text{W}(\text{SeS}_2)_2$ | $\begin{bmatrix} 10.1 & 0.0 & 0.0 \\ 0.0 & 10.1 & 0.0 \\ 0.0 & 0.0 & 2.2 \end{bmatrix}$ | 4.67 |
| mp-1025948 | $\text{Mo}_2\text{W}(\text{SeS}_2)_2$ | $\begin{bmatrix} 10.1 & 0.0 & 0.0 \\ 0.0 & 10.1 & 0.0 \\ 0.0 & 0.0 & 2.2 \end{bmatrix}$ | 4.66 |
| mp-1025874 | $\text{MoS}_2$                        | $\begin{bmatrix} 10.2 & 0.0 & 0.0 \\ 0.0 & 10.2 & 0.0 \\ 0.0 & 0.0 & 2.2 \end{bmatrix}$ | 4.64 |

|            |                                                   |                                                                                         |      |
|------------|---------------------------------------------------|-----------------------------------------------------------------------------------------|------|
| mp-1071956 | TiNF                                              | $\begin{bmatrix} 8.8 & 0.0 & 0.0 \\ 0.0 & 9.8 & 0.0 \\ 0.0 & 0.0 & 2.1 \end{bmatrix}$   | 4.64 |
| mp-1023933 | WSe <sub>2</sub>                                  | $\begin{bmatrix} 8.6 & 0.0 & 0.0 \\ 0.0 & 8.6 & 0.0 \\ 0.0 & 0.0 & 1.9 \end{bmatrix}$   | 4.62 |
| mp-1027492 | MoSeS                                             | $\begin{bmatrix} 11.6 & 0.0 & 0.0 \\ 0.0 & 11.6 & 0.0 \\ 0.0 & 0.0 & 2.5 \end{bmatrix}$ | 4.61 |
| mp-1027687 | MoSeS                                             | $\begin{bmatrix} 11.7 & 0.0 & 0.0 \\ 0.0 & 11.7 & 0.0 \\ 0.0 & 0.0 & 2.5 \end{bmatrix}$ | 4.59 |
| mp-1027795 | Mo <sub>3</sub> W(SeS <sub>3</sub> ) <sub>2</sub> | $\begin{bmatrix} 10.7 & 0.0 & 0.0 \\ 0.0 & 10.7 & 0.0 \\ 0.0 & 0.0 & 2.3 \end{bmatrix}$ | 4.58 |
| mp-1027580 | MoSeS                                             | $\begin{bmatrix} 11.7 & 0.0 & 0.0 \\ 0.0 & 11.7 & 0.0 \\ 0.0 & 0.0 & 2.6 \end{bmatrix}$ | 4.58 |
| mp-1026980 | Mo <sub>2</sub> Se <sub>3</sub> S                 | $\begin{bmatrix} 12.0 & 0.0 & 0.0 \\ 0.0 & 12.0 & 0.0 \\ 0.0 & 0.0 & 2.6 \end{bmatrix}$ | 4.57 |
| mp-1026916 | MoSeS                                             | $\begin{bmatrix} 11.7 & 0.0 & 0.0 \\ 0.0 & 11.7 & 0.0 \\ 0.0 & 0.0 & 2.6 \end{bmatrix}$ | 4.57 |



|            |                                       |                                                                                         |      |
|------------|---------------------------------------|-----------------------------------------------------------------------------------------|------|
| mp-1027608 | $\text{Mo}_2\text{SeS}_3$             | $\begin{bmatrix} 11.4 & 0.0 & 0.0 \\ 0.0 & 11.4 & 0.0 \\ 0.0 & 0.0 & 2.5 \end{bmatrix}$ | 4.55 |
| mp-1025824 | $\text{MoW}_2(\text{SeS}_2)_2$        | $\begin{bmatrix} 9.8 & 0.0 & 0.0 \\ 0.0 & 9.8 & 0.0 \\ 0.0 & 0.0 & 2.2 \end{bmatrix}$   | 4.54 |
| mp-1027537 | $\text{Mo}_3\text{W}(\text{SeS}_3)_2$ | $\begin{bmatrix} 10.9 & 0.0 & 0.0 \\ 0.0 & 10.9 & 0.0 \\ 0.0 & 0.0 & 2.4 \end{bmatrix}$ | 4.53 |
| mp-1027890 | $\text{Mo}_2\text{SeS}_3$             | $\begin{bmatrix} 11.5 & 0.0 & 0.0 \\ 0.0 & 11.5 & 0.0 \\ 0.0 & 0.0 & 2.5 \end{bmatrix}$ | 4.53 |
| mp-1027472 | $\text{Mo}_3\text{W}(\text{SeS}_3)_2$ | $\begin{bmatrix} 10.9 & 0.0 & 0.0 \\ 0.0 & 10.9 & 0.0 \\ 0.0 & 0.0 & 2.4 \end{bmatrix}$ | 4.53 |
| mp-1027646 | $\text{Mo}_3\text{W}(\text{SeS}_3)_2$ | $\begin{bmatrix} 10.9 & 0.0 & 0.0 \\ 0.0 & 10.9 & 0.0 \\ 0.0 & 0.0 & 2.4 \end{bmatrix}$ | 4.53 |
| mp-1027294 | $\text{Mo}_3\text{W}(\text{SeS}_3)_2$ | $\begin{bmatrix} 10.9 & 0.0 & 0.0 \\ 0.0 & 10.9 & 0.0 \\ 0.0 & 0.0 & 2.4 \end{bmatrix}$ | 4.53 |
| mp-1025911 | $\text{Mo}_2\text{WS}_6$              | $\begin{bmatrix} 9.9 & 0.0 & 0.0 \\ 0.0 & 9.9 & 0.0 \\ 0.0 & 0.0 & 2.2 \end{bmatrix}$   | 4.52 |

|            |                                     |                                                                                           |      |
|------------|-------------------------------------|-------------------------------------------------------------------------------------------|------|
| mp-1025663 | $\text{MoW}_2(\text{SeS}_2)_2$      | $\begin{bmatrix} 9.8 & 0.0 & 0.0 \\ 0.0 & 9.8 & 0.0 \\ 0.0 & 0.0 & 2.2 \end{bmatrix}$     | 4.52 |
| mp-1023929 | $\text{WSeS}$                       | $\begin{bmatrix} 8.5 & 0.0 & 0.0 \\ 0.0 & 8.5 & 0.0 \\ 0.0 & 0.0 & 1.9 \end{bmatrix}$     | 4.52 |
| mp-1025599 | $\text{W}_3(\text{Se}_2\text{S})_2$ | $\begin{bmatrix} 9.8 & 0.0 & 0.0 \\ 0.0 & 9.8 & 0.0 \\ 0.0 & 0.0 & 2.2 \end{bmatrix}$     | 4.47 |
| mp-1025588 | $\text{W}_3(\text{Se}_2\text{S})_2$ | $\begin{bmatrix} 9.8 & 0.0 & 0.0 \\ 0.0 & 9.8 & 0.0 \\ 0.0 & 0.0 & 2.2 \end{bmatrix}$     | 4.46 |
| mp-754748  | $\text{CoO}_2$                      | $\begin{bmatrix} 10.8 & 0.0 & -0.1 \\ 0.0 & 10.9 & 0.1 \\ -0.1 & 0.1 & 2.4 \end{bmatrix}$ | 4.45 |
| mp-1027274 | $\text{MoWSeS}_3$                   | $\begin{bmatrix} 10.6 & 0.0 & 0.0 \\ 0.0 & 10.6 & 0.0 \\ 0.0 & 0.0 & 2.4 \end{bmatrix}$   | 4.44 |
| mp-1030745 | $\text{MoWSeS}_3$                   | $\begin{bmatrix} 10.6 & 0.0 & 0.0 \\ 0.0 & 10.6 & 0.0 \\ 0.0 & 0.0 & 2.4 \end{bmatrix}$   | 4.44 |
| mp-1027292 | $\text{MoWSeS}_3$                   | $\begin{bmatrix} 10.6 & 0.0 & 0.0 \\ 0.0 & 10.6 & 0.0 \\ 0.0 & 0.0 & 2.4 \end{bmatrix}$   | 4.44 |

|            |                                                 |                                                                                         |      |
|------------|-------------------------------------------------|-----------------------------------------------------------------------------------------|------|
| mp-1026975 | MoWSeS <sub>3</sub>                             | $\begin{bmatrix} 10.6 & 0.0 & 0.0 \\ 0.0 & 10.6 & 0.0 \\ 0.0 & 0.0 & 2.4 \end{bmatrix}$ | 4.43 |
| mp-1027391 | MoWSeS <sub>3</sub>                             | $\begin{bmatrix} 10.6 & 0.0 & 0.0 \\ 0.0 & 10.6 & 0.0 \\ 0.0 & 0.0 & 2.4 \end{bmatrix}$ | 4.43 |
| mp-1030146 | MoWSeS <sub>3</sub>                             | $\begin{bmatrix} 10.6 & 0.0 & 0.0 \\ 0.0 & 10.6 & 0.0 \\ 0.0 & 0.0 & 2.4 \end{bmatrix}$ | 4.43 |
| mp-1026034 | Mo(WSeS <sub>3</sub> ) <sub>2</sub>             | $\begin{bmatrix} 9.6 & 0.0 & 0.0 \\ 0.0 & 9.6 & 0.0 \\ 0.0 & 0.0 & 2.2 \end{bmatrix}$   | 4.40 |
| mp-1027159 | MoW(SeS) <sub>2</sub>                           | $\begin{bmatrix} 11.2 & 0.0 & 0.0 \\ 0.0 & 11.2 & 0.0 \\ 0.0 & 0.0 & 2.6 \end{bmatrix}$ | 4.39 |
| mp-1025689 | Mo(WSeS <sub>3</sub> ) <sub>2</sub>             | $\begin{bmatrix} 9.7 & 0.0 & 0.0 \\ 0.0 & 9.7 & 0.0 \\ 0.0 & 0.0 & 2.2 \end{bmatrix}$   | 4.39 |
| mp-1025584 | W <sub>3</sub> (SeS <sub>2</sub> ) <sub>2</sub> | $\begin{bmatrix} 9.6 & 0.0 & 0.0 \\ 0.0 & 9.6 & 0.0 \\ 0.0 & 0.0 & 2.2 \end{bmatrix}$   | 4.39 |
| mp-1027569 | Mo <sub>3</sub> WS <sub>8</sub>                 | $\begin{bmatrix} 10.8 & 0.0 & 0.0 \\ 0.0 & 10.8 & 0.0 \\ 0.0 & 0.0 & 2.5 \end{bmatrix}$ | 4.39 |

|            |                                 |                                                                                         |      |
|------------|---------------------------------|-----------------------------------------------------------------------------------------|------|
| mp-1027645 | $\text{Mo}_3\text{WS}_8$        | $\begin{bmatrix} 10.8 & 0.0 & 0.0 \\ 0.0 & 10.8 & 0.0 \\ 0.0 & 0.0 & 2.5 \end{bmatrix}$ | 4.38 |
| mp-1025577 | $\text{W}_3(\text{SeS}_2)_2$    | $\begin{bmatrix} 9.8 & 0.0 & 0.0 \\ 0.0 & 9.8 & 0.0 \\ 0.0 & 0.0 & 2.3 \end{bmatrix}$   | 4.36 |
| mp-1030520 | $\text{MoW}_3(\text{SeS}_3)_2$  | $\begin{bmatrix} 10.4 & 0.0 & 0.0 \\ 0.0 & 10.4 & 0.0 \\ 0.0 & 0.0 & 2.4 \end{bmatrix}$ | 4.35 |
| mp-1023925 | $\text{WS}_2$                   | $\begin{bmatrix} 7.7 & 0.0 & 0.0 \\ 0.0 & 7.7 & 0.0 \\ 0.0 & 0.0 & 1.8 \end{bmatrix}$   | 4.35 |
| mp-1029037 | $\text{MoW}_3(\text{SeS}_3)_2$  | $\begin{bmatrix} 10.4 & 0.0 & 0.0 \\ 0.0 & 10.4 & 0.0 \\ 0.0 & 0.0 & 2.4 \end{bmatrix}$ | 4.34 |
| mp-1028769 | $\text{W}_2\text{Se}_3\text{S}$ | $\begin{bmatrix} 10.6 & 0.0 & 0.0 \\ 0.0 & 10.6 & 0.0 \\ 0.0 & 0.0 & 2.4 \end{bmatrix}$ | 4.33 |
| mp-1028686 | $\text{W}_2\text{Se}_3\text{S}$ | $\begin{bmatrix} 10.6 & 0.0 & 0.0 \\ 0.0 & 10.6 & 0.0 \\ 0.0 & 0.0 & 2.4 \end{bmatrix}$ | 4.32 |
| mp-1030566 | $\text{MoW}_3(\text{SeS})_4$    | $\begin{bmatrix} 10.9 & 0.0 & 0.0 \\ 0.0 & 10.9 & 0.0 \\ 0.0 & 0.0 & 2.5 \end{bmatrix}$ | 4.32 |

|            |                   |                                                                                         |      |
|------------|-------------------|-----------------------------------------------------------------------------------------|------|
| mp-1027269 | MoWS <sub>4</sub> | $\begin{bmatrix} 10.5 & 0.0 & 0.0 \\ 0.0 & 10.5 & 0.0 \\ 0.0 & 0.0 & 2.4 \end{bmatrix}$ | 4.31 |
| mp-1028488 | WSeS              | $\begin{bmatrix} 10.4 & 0.0 & 0.0 \\ 0.0 & 10.4 & 0.0 \\ 0.0 & 0.0 & 2.4 \end{bmatrix}$ | 4.31 |
| mp-1028772 | WSeS              | $\begin{bmatrix} 10.4 & 0.0 & 0.0 \\ 0.0 & 10.4 & 0.0 \\ 0.0 & 0.0 & 2.4 \end{bmatrix}$ | 4.30 |
| mp-1028663 | WSeS              | $\begin{bmatrix} 10.4 & 0.0 & 0.0 \\ 0.0 & 10.4 & 0.0 \\ 0.0 & 0.0 & 2.4 \end{bmatrix}$ | 4.30 |
| mp-1027647 | MoWS <sub>4</sub> | $\begin{bmatrix} 10.5 & 0.0 & 0.0 \\ 0.0 & 10.5 & 0.0 \\ 0.0 & 0.0 & 2.4 \end{bmatrix}$ | 4.30 |
| mp-1028764 | WSeS              | $\begin{bmatrix} 10.4 & 0.0 & 0.0 \\ 0.0 & 10.4 & 0.0 \\ 0.0 & 0.0 & 2.4 \end{bmatrix}$ | 4.29 |
| mp-1030119 | MoWS <sub>4</sub> | $\begin{bmatrix} 10.6 & 0.0 & 0.0 \\ 0.0 & 10.6 & 0.0 \\ 0.0 & 0.0 & 2.5 \end{bmatrix}$ | 4.29 |
| mp-1025571 | WS <sub>2</sub>   | $\begin{bmatrix} 9.3 & 0.0 & 0.0 \\ 0.0 & 9.3 & 0.0 \\ 0.0 & 0.0 & 2.2 \end{bmatrix}$   | 4.29 |

|            |                                    |                                                                                               |      |
|------------|------------------------------------|-----------------------------------------------------------------------------------------------|------|
| mp-1027273 | MoW <sub>3</sub> S <sub>8</sub>    | $\begin{bmatrix} 10.3 & 0.0 & 0.0 \\ 0.0 & 10.3 & 0.0 \\ 0.0 & 0.0 & 2.4 \end{bmatrix}$       | 4.23 |
| mp-1029246 | MoW <sub>3</sub> S <sub>8</sub>    | $\begin{bmatrix} 10.3 & 0.0 & 0.0 \\ 0.0 & 10.3 & 0.0 \\ 0.0 & 0.0 & 2.5 \end{bmatrix}$       | 4.21 |
| mp-1028558 | W <sub>2</sub> SeS <sub>3</sub>    | $\begin{bmatrix} 10.4 & 0.0 & 0.0 \\ 0.0 & 10.4 & 0.0 \\ 0.0 & 0.0 & 2.5 \end{bmatrix}$       | 4.19 |
| mp-1278455 | CoO <sub>2</sub>                   | $\begin{bmatrix} 12.3 & -0.1 & -2.9 \\ -0.1 & 12.4 & -1.6 \\ -2.9 & -1.6 & 4.4 \end{bmatrix}$ | 4.17 |
| mp-1028441 | WS <sub>2</sub>                    | $\begin{bmatrix} 10.0 & 0.0 & 0.0 \\ 0.0 & 10.0 & 0.0 \\ 0.0 & 0.0 & 2.4 \end{bmatrix}$       | 4.16 |
| mp-1227328 | Ca(BC <sub>3</sub> ) <sub>2</sub>  | $\begin{bmatrix} 14.8 & 0.0 & 0.0 \\ 0.0 & 3.7 & 0.0 \\ 0.0 & 0.0 & 13.4 \end{bmatrix}$       | 4.04 |
| mp-1318786 | LiCo <sub>3</sub> NiO <sub>8</sub> | $\begin{bmatrix} 12.6 & 0.4 & 0.0 \\ 0.4 & 12.3 & 0.0 \\ 0.0 & 0.0 & 3.2 \end{bmatrix}$       | 4.04 |
| mp-1411545 | NiS <sub>2</sub>                   | $\begin{bmatrix} 7.1 & 0.0 & -2.7 \\ 0.0 & 26.6 & 0.0 \\ -2.7 & 0.0 & 26.2 \end{bmatrix}$     | 3.97 |

|            |                              |                                                                                               |      |
|------------|------------------------------|-----------------------------------------------------------------------------------------------|------|
| mp-1272680 | $\text{CoO}_2$               | $\begin{bmatrix} 11.9 & 0.0 & 0.1 \\ 0.0 & 11.9 & -0.2 \\ 0.1 & -0.2 & 3.0 \end{bmatrix}$     | 3.97 |
| mp-752738  | $\text{Co}_3\text{NiO}_8$    | $\begin{bmatrix} 4.0 & -2.4 & -1.5 \\ -2.4 & 11.2 & -0.4 \\ -1.5 & -0.4 & 11.7 \end{bmatrix}$ | 3.96 |
| mp-773511  | $\text{Co}_5\text{NiO}_{12}$ | $\begin{bmatrix} 12.1 & -0.1 & 0.0 \\ -0.1 & 12.0 & 0.0 \\ 0.0 & 0.0 & 3.1 \end{bmatrix}$     | 3.88 |
| mp-1314136 | $\text{LiMnCo}_3\text{O}_8$  | $\begin{bmatrix} 5.7 & -0.5 & 3.6 \\ -0.5 & 11.2 & -0.8 \\ 3.6 & -0.8 & 8.5 \end{bmatrix}$    | 3.72 |
| mp-1066781 | $\text{BrCl}$                | $\begin{bmatrix} 2.7 & 0.0 & 0.0 \\ 0.0 & 1.9 & 0.0 \\ 0.0 & 0.0 & 7.1 \end{bmatrix}$         | 3.65 |
| mp-763057  | $\text{Mn}(\text{CoO}_3)_2$  | $\begin{bmatrix} 11.2 & 0.0 & 0.0 \\ 0.0 & 6.6 & -4.0 \\ 0.0 & -4.0 & 7.7 \end{bmatrix}$      | 3.59 |
| mp-27213   | $\text{AuBr}_3$              | $\begin{bmatrix} 8.5 & 0.0 & 0.0 \\ 0.0 & 2.9 & 0.0 \\ 0.0 & 0.0 & 9.9 \end{bmatrix}$         | 3.39 |
| mp-1296423 | $\text{LiMnCo}_3\text{O}_8$  | $\begin{bmatrix} 10.1 & 0.2 & 0.0 \\ 0.2 & 10.2 & 0.0 \\ 0.0 & 0.0 & 3.1 \end{bmatrix}$       | 3.38 |

|            |                              |                                                                                             |      |
|------------|------------------------------|---------------------------------------------------------------------------------------------|------|
| mp-1285961 | $\text{Li}(\text{CoO}_2)_3$  | $\begin{bmatrix} 10.5 & -0.2 & -0.1 \\ -0.2 & 10.2 & 0.1 \\ -0.1 & 0.1 & 3.2 \end{bmatrix}$ | 3.36 |
| mp-1303340 | $\text{LiMnCo}_3\text{O}_8$  | $\begin{bmatrix} 5.2 & -0.1 & 3.2 \\ -0.1 & 10.1 & 0.0 \\ 3.2 & 0.0 & 7.7 \end{bmatrix}$    | 3.34 |
| mp-755555  | $\text{Mn}_5\text{CoO}_{12}$ | $\begin{bmatrix} 9.8 & -0.1 & 0.0 \\ -0.1 & 9.8 & 0.0 \\ 0.0 & 0.0 & 2.9 \end{bmatrix}$     | 3.34 |
| mp-755862  | $\text{LiMnCo}_3\text{O}_8$  | $\begin{bmatrix} 5.1 & -0.1 & 3.1 \\ -0.1 & 9.5 & -0.1 \\ 3.1 & -0.1 & 7.6 \end{bmatrix}$   | 3.22 |
| mp-1184859 | $\text{HI}_3$                | $\begin{bmatrix} 3.0 & -1.8 & 0.0 \\ -1.8 & 4.6 & 0.0 \\ 0.0 & 0.0 & 1.8 \end{bmatrix}$     | 3.21 |
| mp-759301  | $\text{Li}(\text{CoO}_2)_3$  | $\begin{bmatrix} 10.6 & 0.1 & 0.0 \\ 0.1 & 10.7 & 0.0 \\ 0.0 & 0.0 & 3.4 \end{bmatrix}$     | 3.12 |
| mp-759163  | $\text{VOF}_2$               | $\begin{bmatrix} 3.2 & 0.0 & 0.0 \\ 0.0 & 7.9 & -3.2 \\ 0.0 & -3.2 & 5.5 \end{bmatrix}$     | 3.12 |
| mp-1217314 | $\text{TeMo}_2\text{Se}_3$   | $\begin{bmatrix} 16.4 & 0.0 & 0.0 \\ 0.0 & 16.4 & 0.0 \\ 0.0 & 0.0 & 5.3 \end{bmatrix}$     | 3.09 |



|            |                                                                  |                                                                                             |      |
|------------|------------------------------------------------------------------|---------------------------------------------------------------------------------------------|------|
| mp-1018809 | MoS <sub>2</sub>                                                 | $\begin{bmatrix} 14.3 & 0.0 & 0.0 \\ 0.0 & 14.3 & 0.0 \\ 0.0 & 0.0 & 4.7 \end{bmatrix}$     | 3.03 |
| mp-1221404 | MoSeS                                                            | $\begin{bmatrix} 15.0 & 0.0 & 0.0 \\ 0.0 & 15.0 & 0.0 \\ 0.0 & 0.0 & 5.0 \end{bmatrix}$     | 3.02 |
| mp-9481    | TcS <sub>2</sub>                                                 | $\begin{bmatrix} 15.6 & -1.2 & 2.0 \\ -1.2 & 14.2 & 3.8 \\ 2.0 & 3.8 & 7.7 \end{bmatrix}$   | 2.99 |
| mp-572758  | ReS <sub>2</sub>                                                 | $\begin{bmatrix} 14.0 & -0.2 & 0.0 \\ -0.2 & 12.7 & 2.0 \\ 0.0 & 2.0 & 5.3 \end{bmatrix}$   | 2.96 |
| mp-1217371 | Te <sub>3</sub> Mo <sub>2</sub> Se                               | $\begin{bmatrix} 17.9 & 0.0 & 0.0 \\ 0.0 & 17.9 & 0.0 \\ 0.0 & 0.0 & 6.0 \end{bmatrix}$     | 2.96 |
| mp-754774  | Li <sub>2</sub> Mn <sub>3</sub> (CoO <sub>4</sub> ) <sub>3</sub> | $\begin{bmatrix} 8.9 & 0.1 & -0.1 \\ 0.1 & 4.8 & -2.6 \\ -0.1 & -2.6 & 7.1 \end{bmatrix}$   | 2.93 |
| mp-1018807 | MoSe <sub>2</sub>                                                | $\begin{bmatrix} 15.7 & 0.0 & 0.0 \\ 0.0 & 15.7 & 0.0 \\ 0.0 & 0.0 & 5.5 \end{bmatrix}$     | 2.86 |
| mp-1219546 | ReSeS                                                            | $\begin{bmatrix} 6.1 & -2.8 & 0.0 \\ -2.8 & 13.0 & -0.5 \\ 0.0 & -0.5 & 14.3 \end{bmatrix}$ | 2.84 |

|            |                             |                                                                                           |      |
|------------|-----------------------------|-------------------------------------------------------------------------------------------|------|
| mp-1221485 | $\text{Mo}_2\text{SeS}_3$   | $\begin{bmatrix} 15.0 & 0.0 & 0.0 \\ 0.0 & 15.0 & 0.0 \\ 0.0 & 0.0 & 5.4 \end{bmatrix}$   | 2.80 |
| mp-753228  | $\text{LiMn}_3\text{O}_6$   | $\begin{bmatrix} 8.2 & 0.0 & 0.0 \\ 0.0 & 7.6 & -0.1 \\ 0.0 & -0.1 & 3.1 \end{bmatrix}$   | 2.62 |
| mp-1276496 | $\text{NaV}_2\text{O}_4$    | $\begin{bmatrix} 2.7 & 0.0 & 0.1 \\ 0.0 & 5.4 & 0.1 \\ 0.1 & 0.1 & 7.0 \end{bmatrix}$     | 2.62 |
| mp-861871  | $\text{SeI}_2$              | $\begin{bmatrix} 5.0 & 0.0 & 0.0 \\ 0.0 & 5.0 & 0.0 \\ 0.0 & 0.0 & 13.0 \end{bmatrix}$    | 2.58 |
| mp-752885  | $\text{LiVOF}_3$            | $\begin{bmatrix} 3.2 & -0.8 & -0.9 \\ -0.8 & 4.6 & 1.8 \\ -0.9 & 1.8 & 4.9 \end{bmatrix}$ | 2.53 |
| mp-756552  | $\text{Mg}(\text{NiO}_2)_4$ | $\begin{bmatrix} 8.9 & 0.0 & 0.0 \\ 0.0 & 8.9 & 0.0 \\ 0.0 & 0.0 & 3.6 \end{bmatrix}$     | 2.51 |
| mp-1016190 | $\text{KMn}_3\text{O}_6$    | $\begin{bmatrix} 6.0 & 0.0 & 0.0 \\ 0.0 & 2.4 & 0.0 \\ 0.0 & 0.0 & 5.5 \end{bmatrix}$     | 2.49 |
| mp-1273655 | $\text{MnOF}$               | $\begin{bmatrix} 4.0 & -0.6 & 0.1 \\ -0.6 & 6.0 & 0.9 \\ 0.1 & 0.9 & 2.9 \end{bmatrix}$   | 2.43 |

|            |                                     |                                                                                           |      |
|------------|-------------------------------------|-------------------------------------------------------------------------------------------|------|
| mp-1223545 | $\text{KMn}_2\text{O}_4$            | $\begin{bmatrix} 2.8 & 0.0 & 0.2 \\ 0.0 & 6.7 & 0.0 \\ 0.2 & 0.0 & 5.9 \end{bmatrix}$     | 2.42 |
| mp-997108  | $\text{RbAgO}_2$                    | $\begin{bmatrix} 4.6 & -1.4 & -0.6 \\ -1.4 & 4.0 & 0.1 \\ -0.6 & 0.1 & 2.7 \end{bmatrix}$ | 2.42 |
| mp-2422143 | $\text{Pd}(\text{Se}_3\text{Br})_2$ | $\begin{bmatrix} 3.8 & 0.0 & -0.2 \\ 0.0 & 6.9 & -1.5 \\ -0.2 & -1.5 & 8.3 \end{bmatrix}$ | 2.42 |
| mp-1104174 | $\text{K}_4(\text{NiO}_2)_3$        | $\begin{bmatrix} 2.7 & 0.0 & 0.4 \\ 0.0 & 3.4 & 0.0 \\ 0.4 & 0.0 & 1.6 \end{bmatrix}$     | 2.41 |
| mp-1101129 | $\text{ThPbI}_{12}$                 | $\begin{bmatrix} 7.6 & 0.0 & 0.0 \\ 0.0 & 4.1 & 0.0 \\ 0.0 & 0.0 & 3.2 \end{bmatrix}$     | 2.37 |
| mp-1018888 | $\text{PdCl}_2$                     | $\begin{bmatrix} 5.6 & 0.0 & 0.0 \\ 0.0 & 2.4 & 0.2 \\ 0.0 & 0.2 & 3.4 \end{bmatrix}$     | 2.33 |
| mp-1003484 | $\text{MgMn}_4\text{O}_8$           | $\begin{bmatrix} 6.7 & 0.2 & 1.0 \\ 0.2 & 7.7 & -0.8 \\ 1.0 & -0.8 & 3.9 \end{bmatrix}$   | 2.31 |
| mp-758725  | $\text{Li}_2(\text{CoO}_2)_3$       | $\begin{bmatrix} 9.1 & 0.0 & 0.0 \\ 0.0 & 9.1 & 0.0 \\ 0.0 & 0.0 & 4.0 \end{bmatrix}$     | 2.31 |

|            |                                    |                                                                                         |      |
|------------|------------------------------------|-----------------------------------------------------------------------------------------|------|
| mp-1068977 | $\text{K}_2\text{PdC}_2$           | $\begin{bmatrix} 3.6 & 0.0 & 0.0 \\ 0.0 & 3.6 & 0.0 \\ 0.0 & 0.0 & 8.1 \end{bmatrix}$   | 2.29 |
| mp-20343   | $\text{NaAuO}_2$                   | $\begin{bmatrix} 2.8 & 0.0 & 0.0 \\ 0.0 & 3.5 & 0.0 \\ 0.0 & 0.0 & 6.2 \end{bmatrix}$   | 2.25 |
| mp-3342    | $\text{ZnPS}_3$                    | $\begin{bmatrix} 6.8 & 0.0 & 0.0 \\ 0.0 & 6.8 & 0.0 \\ 0.0 & 0.0 & 3.3 \end{bmatrix}$   | 2.04 |
| mp-772788  | $\text{Ba}_2\text{Cu}_2\text{O}_5$ | $\begin{bmatrix} 4.1 & 0.0 & 0.0 \\ 0.0 & 8.0 & 0.0 \\ 0.0 & 0.0 & 5.8 \end{bmatrix}$   | 1.97 |
| mp-1193708 | $\text{Al}_2(\text{PS}_3)_3$       | $\begin{bmatrix} 6.5 & 0.0 & 0.0 \\ 0.0 & 6.5 & 0.0 \\ 0.0 & 0.0 & 3.5 \end{bmatrix}$   | 1.88 |
| mp-569017  | $\text{PdI}_2$                     | $\begin{bmatrix} 12.8 & 0.0 & 0.0 \\ 0.0 & 7.0 & 0.0 \\ 0.0 & 0.0 & 7.8 \end{bmatrix}$  | 1.82 |
| mp-580886  | $\text{ZrIN}$                      | $\begin{bmatrix} 5.6 & 0.0 & -0.2 \\ 0.0 & 7.9 & 0.0 \\ -0.2 & 0.0 & 7.9 \end{bmatrix}$ | 1.42 |
| mp-567441  | $\text{HfIN}$                      | $\begin{bmatrix} 5.4 & 0.0 & -0.2 \\ 0.0 & 7.2 & 0.0 \\ -0.2 & 0.0 & 7.2 \end{bmatrix}$ | 1.34 |

|           |                                   |                                                                                       |      |
|-----------|-----------------------------------|---------------------------------------------------------------------------------------|------|
| mp-561973 | K(TeO <sub>3</sub> ) <sub>2</sub> | $\begin{bmatrix} 4.4 & 0.0 & 0.0 \\ 0.0 & 4.0 & 0.2 \\ 0.0 & 0.2 & 4.5 \end{bmatrix}$ | 1.16 |
|-----------|-----------------------------------|---------------------------------------------------------------------------------------|------|

---

## References

- (1) Kresse, G.; Hafner, J. Ab Initio Molecular Dynamics for Liquid Metals. *Physical Review B* **1993**, *47*, 558–561.
- (2) Kresse, G.; Furthmüller, J. Efficiency of Ab-Initio Total Energy Calculations for Metals and Semiconductors Using a Plane-Wave Basis Set. *Computational Materials Science* **1996**, *6*, 15–50.
- (3) Rosen, A. S.; Gallant, M.; George, J.; Riebesell, J.; Sahasrabuddhe, H.; Shen, J.-X.; Wen, M.; Evans, M. L.; Petretto, G.; Waroquiers, D.; Rignanese, G.-M.; Persson, K. A.; Jain, A.; Ganose, A. M. Jobflow: Computational Workflows Made Simple. *Journal of Open Source Software* **2024**, *9*, 5995.
